# Supplementary material
Source: publisher site journal article supplement (https://www.spandidos-publications.com/7253/downloadSupplementary)

Figure S1. Flow cytometry analysis of bone marrow aspirate. Bone marrow flow cytometry indicated acute myeloid leukemia diagnosis: CD34<sup>+</sup>, HLA-DR<sup>+</sup>, CD33<sup>+</sup>, CD 38<sup>+</sup>, CD117<sup>+</sup>, CD13<sup>+</sup>, CD123<sup>+</sup>, CD7<sup>+</sup>, CD15<sup>-</sup>, CD64<sup>-</sup>, CD20<sup>-</sup>, CD10<sup>-</sup>, cCD79a<sup>-</sup>, cCD3 and CD19<sup>-</sup>.

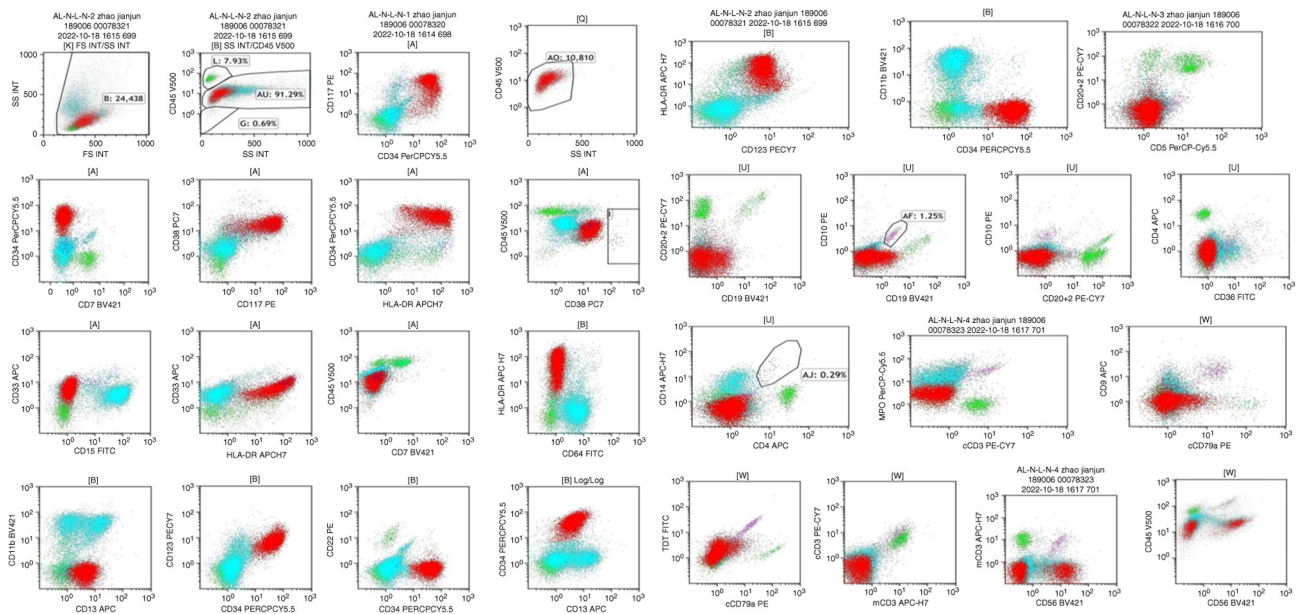

Supplement: Supplementary file 1 [file downloadSupplementary]
